# Supplementary material
Source: Royal Society of Chemistry journal article supplement (doi:10.1039/d6tc00471g)

**Magnetic Flux Engineering with Metglas Concentrators for High-Performance  
Magneto-Mechano-Electric Energy Harvesting Devices**

Deepak R. Patil<sup>1</sup>, Donggeon Baek<sup>2</sup>, Seung Yoon Ryu\*<sup>1</sup>, Jungho Ryu\*<sup>2</sup>

<sup>1</sup>Department of Physics, Dongguk 562 University, Seoul 04620, Republic of Korea

<sup>2</sup>School of Materials Science and Engineering, Yeungnam University, Gyeongsan, 38541,  
South Korea

**Corresponding authors:** [jhryu@ynu.ac.kr](mailto:jhryu@ynu.ac.kr), [justie74@dongguk.edu](mailto:justie74@dongguk.edu)

**Table S1:** The material properties of materials used as magnetic flux concentration (MFC).

| Materials                | Relative permeability<br>$\mu/\mu_0$ |
|--------------------------|--------------------------------------|
| Nickel                   | 100 – 600                            |
| Iron (99.95% pure)       | 200000                               |
| Cobalt-iron              | 18000                                |
| Iron (99.8% pure)        | 5000                                 |
| Ferritic stainless steel | 1000 – 1800                          |
| Mn-Zn ferrites           | 1000 – 10000                         |
| <b>Metglas 2714A</b>     | <b>1000000</b>                       |

**Fig. S1:** Output RMS currents and RMS voltages, of MME generator without (w/o) and with (w/t) Meglas MFC at various load resistances.

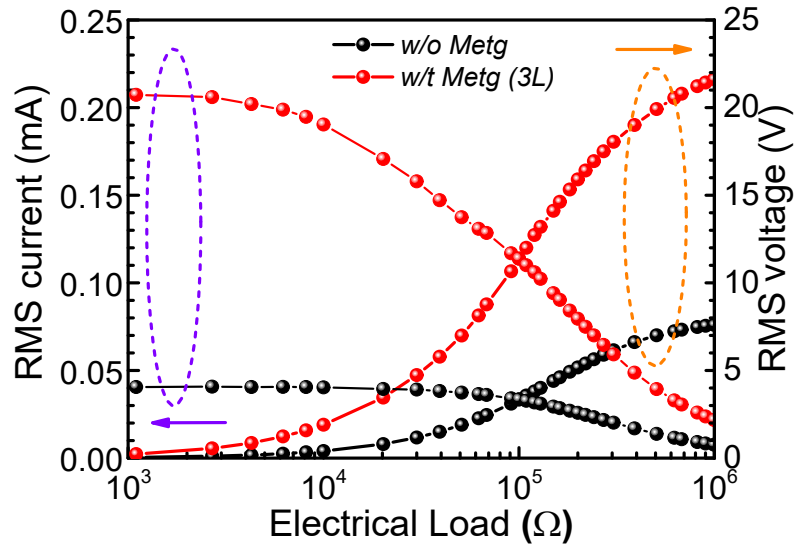

**Fig. S2.** RMS output power of the MME generators integrated with Metglas MFCs with different widths of the Metglas MFC as a function of external load resistance under an applied AC magnetic field of 10 Oe.

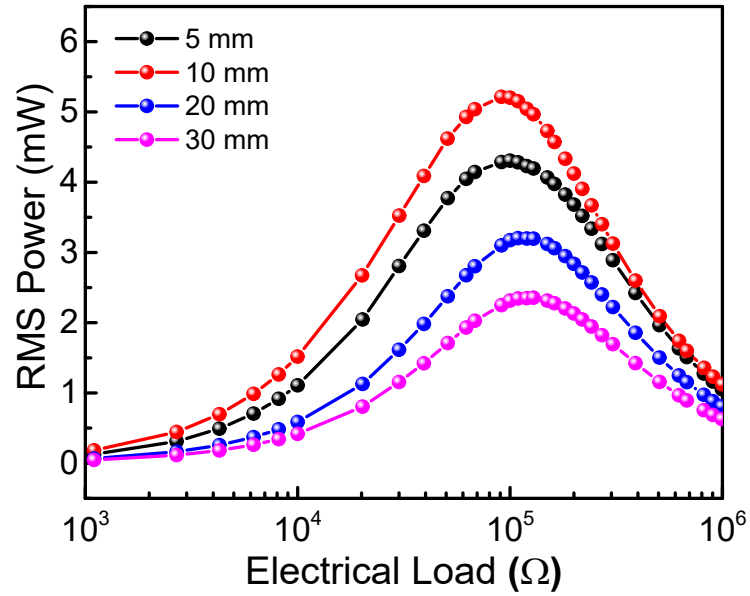

**Fig. S3.** Output RMS current and RMS voltage of the MME generator without (w/o) and with (w/t) Metglas magnetic flux concentrators (MFCs), comparing different numbers of Metglas layers at various load resistances.

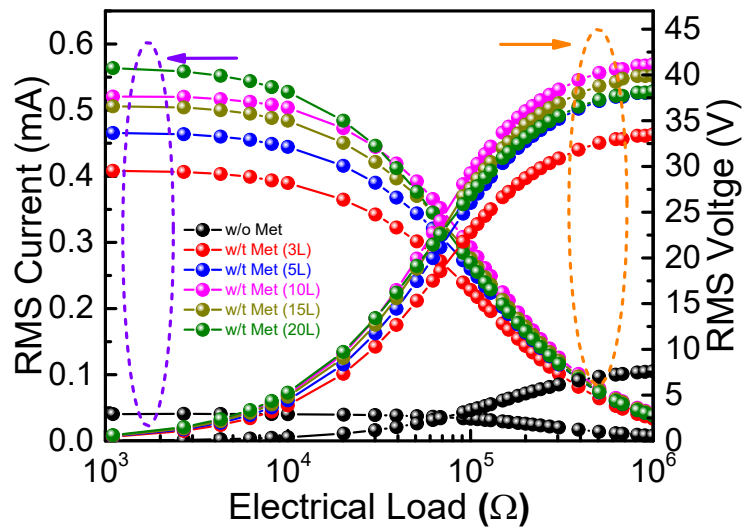

**Fig. S4.** Comparison of RMS output power of the MME generators integrated with different MFC materials as a function of external load resistance under an applied AC magnetic field of 10 Oe.

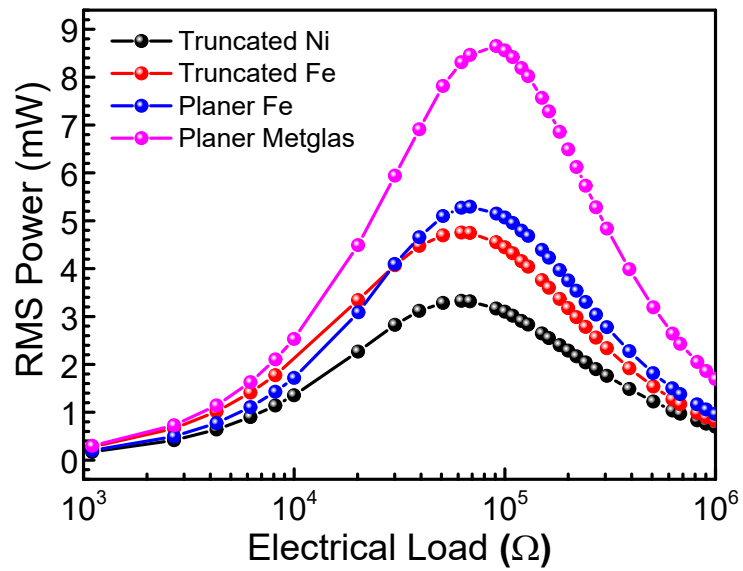

**Fig. S5:** Top view of experimental setup for the measurement of vibration amplitude using a laser interferometer.

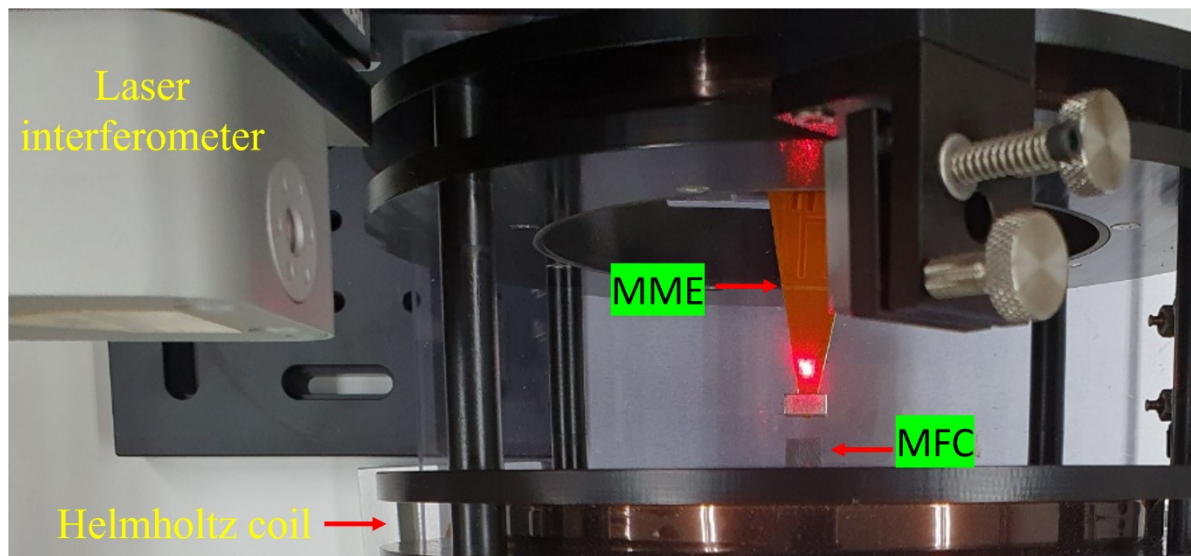

**Figure S6:** Experimental setup demonstrating the operation of powering arrays of 120 white LEDs under an applied magnetic field generated by a Helmholtz coil.

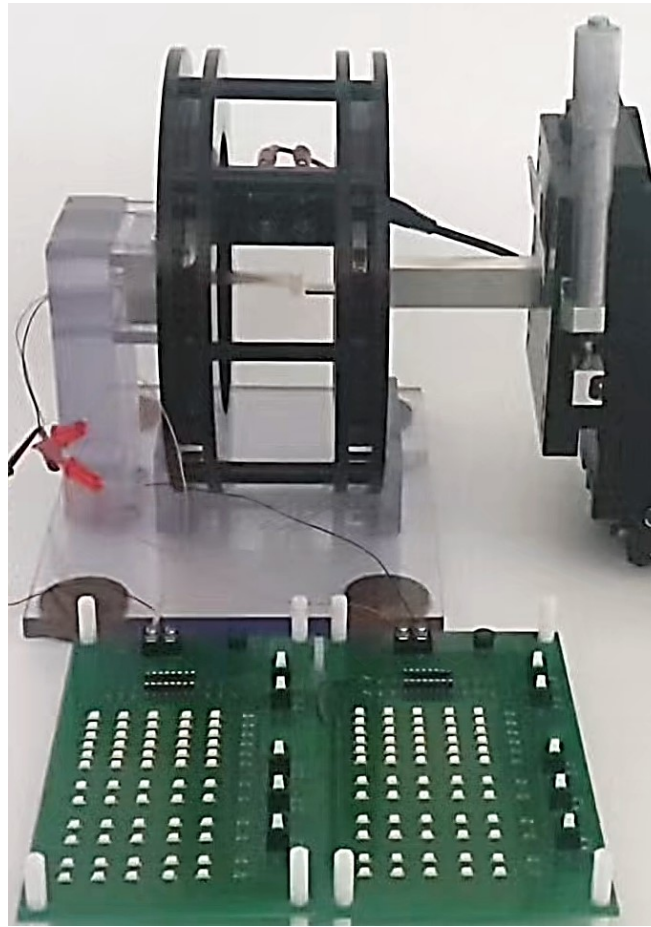

Supplement: d6tc00471g1.pdf [file d6tc00471g1.pdf]
